# Supplementary material
Source: PubMed Central journal article supplement (PMC2600878)

# Supplemental Figure 1

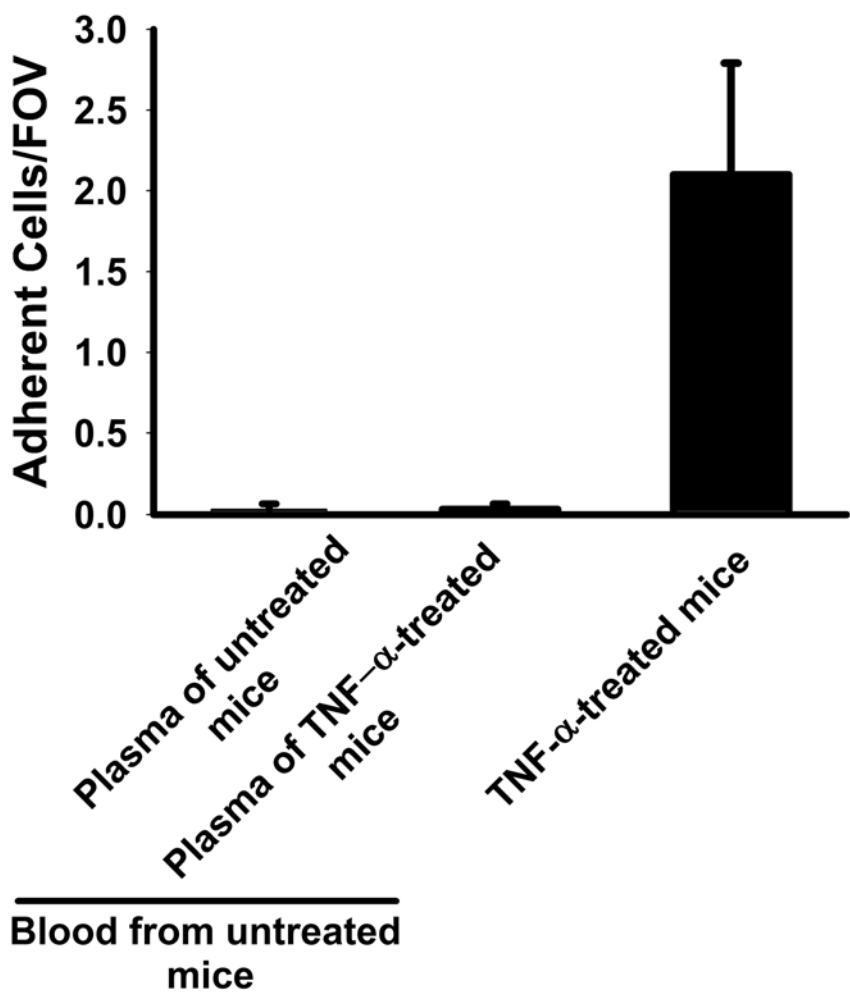

# Supplemental Figure 2

## A

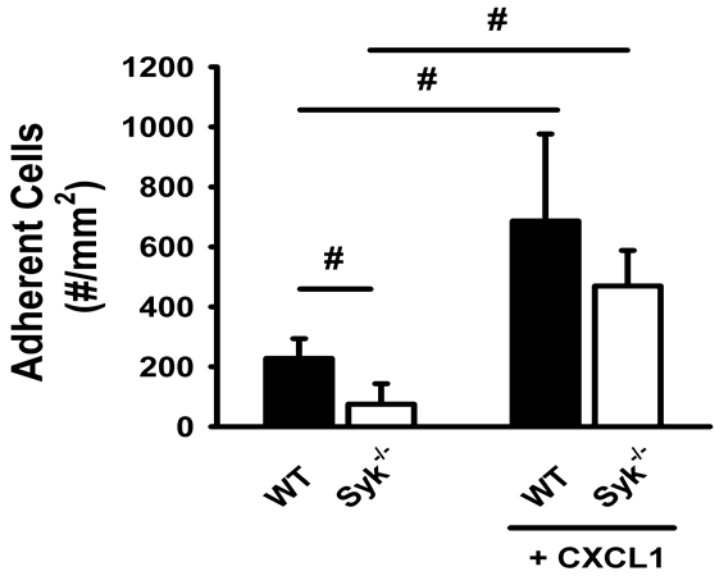

## B

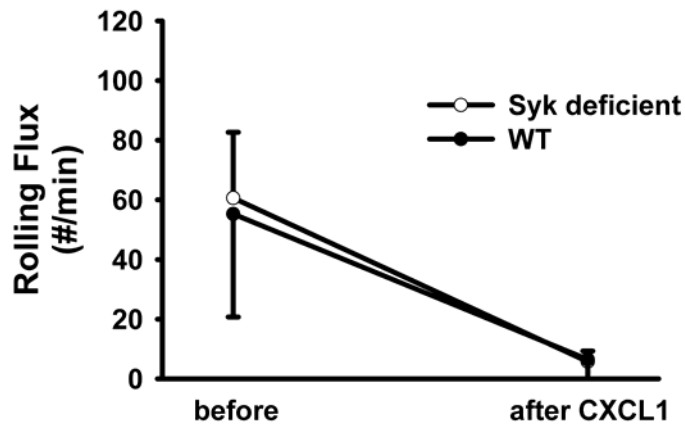

Supplement: NIHMS26144-supplement-01.pdf [file NIHMS26144-supplement-01.pdf]
